# Supplementary material for: On two alizarin polymorphs
Source: Royal Society of Chemistry journal article supplement (doi:10.1039/c2ce06063a), 2012-01-01
Supplement: c2ce06063a.pdf [file c2ce06063a.pdf]

# SUPPORTING INFORMATION TO

## On Two Alizarin Polymorphs

by

*Michał K. Cyrański,<sup>a</sup> Michał H. Jamróz,<sup>b</sup> Anna  
Rygula,<sup>c</sup>  
Jan Cz. Dobrowolski,<sup>b,d</sup> Łukasz Dobrzycki<sup>\*,a</sup>, and  
Malgorzata Baranska<sup>\*c,e</sup>*

<sup>a</sup> FACULTY OF CHEMISTRY, UNIVERSITY OF WARSAW, PASTEURA 1, 02-093  
WARSAW, POLAND

<sup>b</sup> SPECTROSCOPY AND MOLECULAR MODELING GROUP, INDUSTRIAL  
CHEMISTRY RESEARCH INSTITUTE, 8 RYDYGIERA STREET, 01-793 WARSAW,  
POLAND

<sup>c</sup> FACULTY OF CHEMISTRY, JAGIELLONIAN UNIVERSITY, INGARDENA 3, 30-060  
CRACOW, POLAND

<sup>d</sup> LABORATORY FOR THEORETICAL METHODS AND CALCULATIONS, NATIONAL  
MEDICINES INSTITUTE, 30/34 CHEŁMSKA STREET, 00-725 WARSAW, POLAND

<sup>e</sup> JAGIELLONIAN CENTER FOR EXPERIMENTAL THERAPEUTICS (JCET),  
JAGIELLONIAN UNIVERSITY, 14 BOBRZYNSKIEGO STR., 30-348 KRAKOW,  
POLAND

### Juxtaposition of the theoretical and experimental PXRD patterns

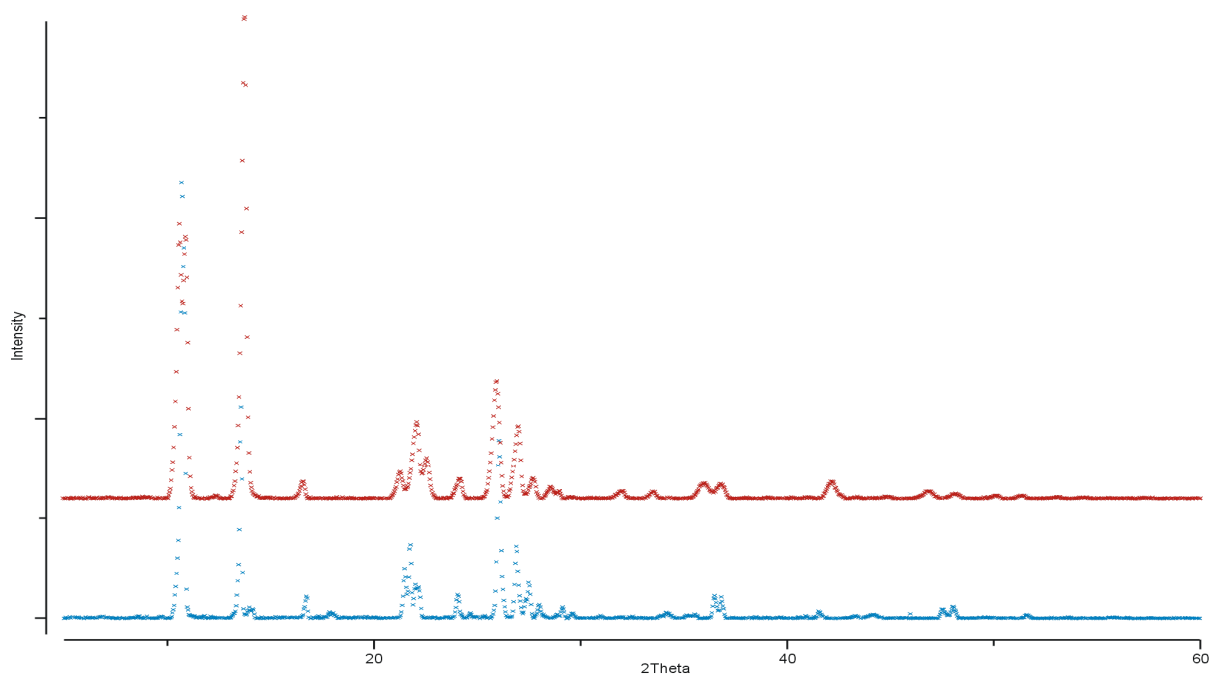

**Figure 1SI.** Comparison of PXRD patterns of polymorph I (dashed blue line) and of polymorph II (dashed red line).

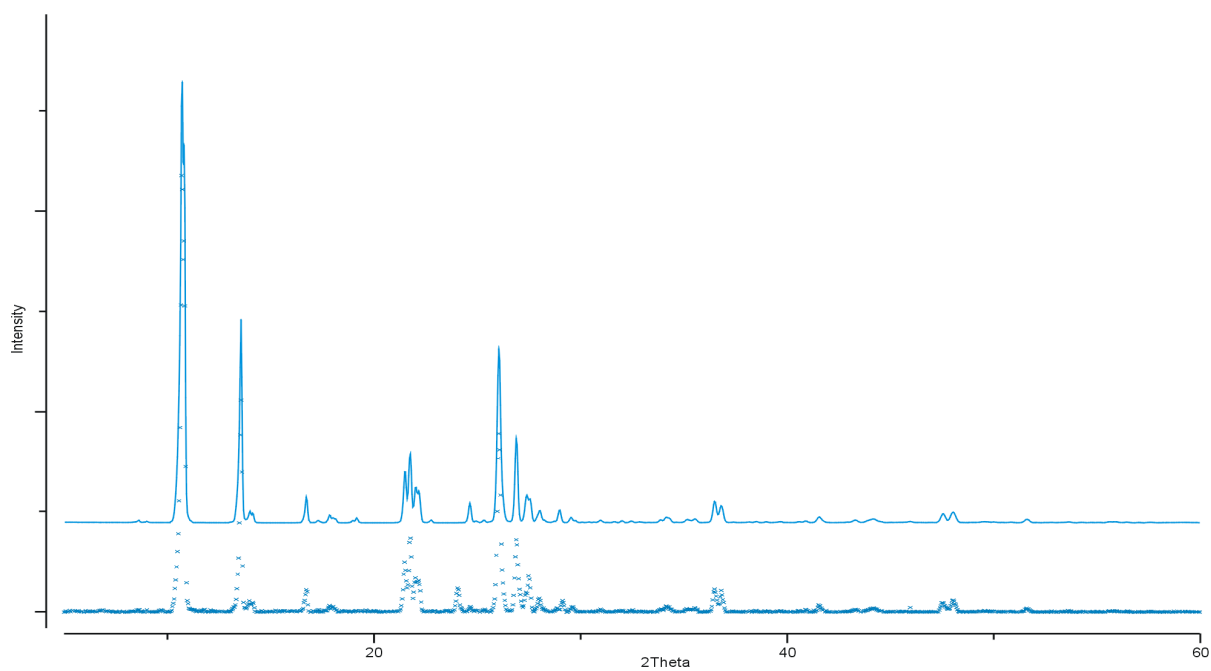

**Figure 2SI.** PXRD pattern (dashed line) and theoretically calculated pattern (solid line) of polymorph I. Note that the unit cell parameters slightly differ in 295K. They are  $a=20.188\text{\AA}$ ,  $b=3.639\text{\AA}$ ,  $c=21.149\text{\AA}$ ,  $\beta=104.54^\circ$ .

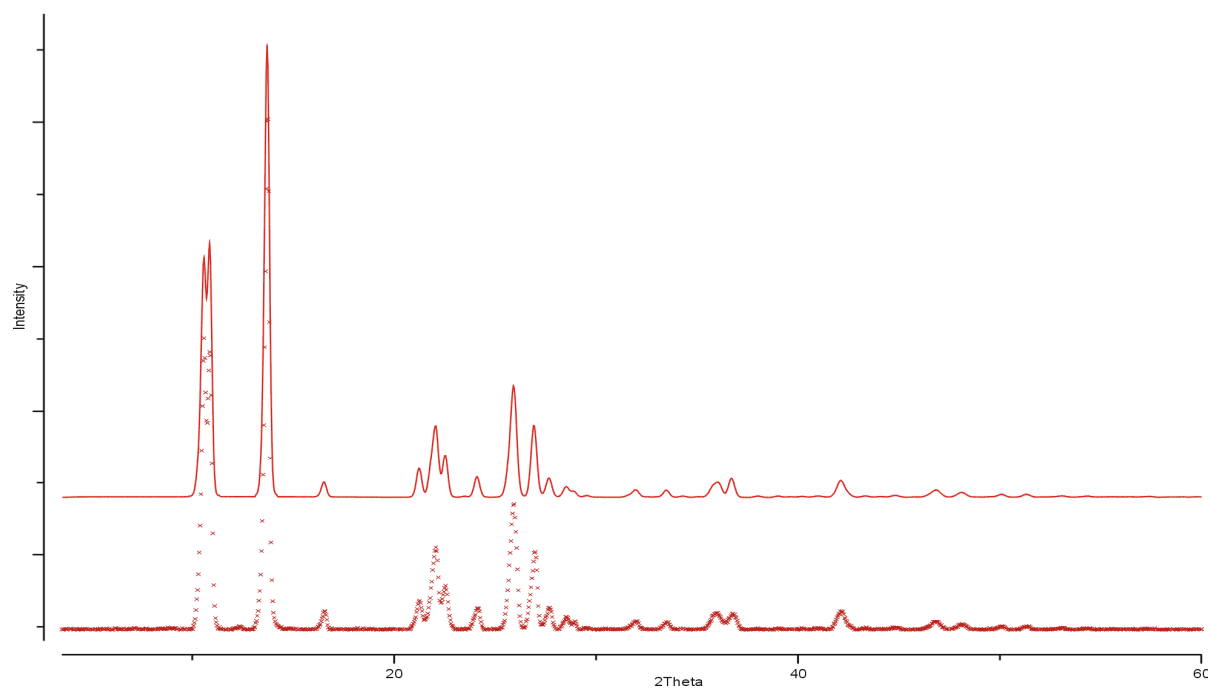

**Fig. 3SI.** PXRD pattern (dashed line) and theoretically calculated pattern (solid line) of polymorph II. Note that the unit cell parameters slightly differ in 295K. They are  $a=8.265\text{\AA}$ ,  $b=3.783\text{\AA}$ ,  $c=17.014\text{\AA}$ ,  $\beta=100.43^\circ$

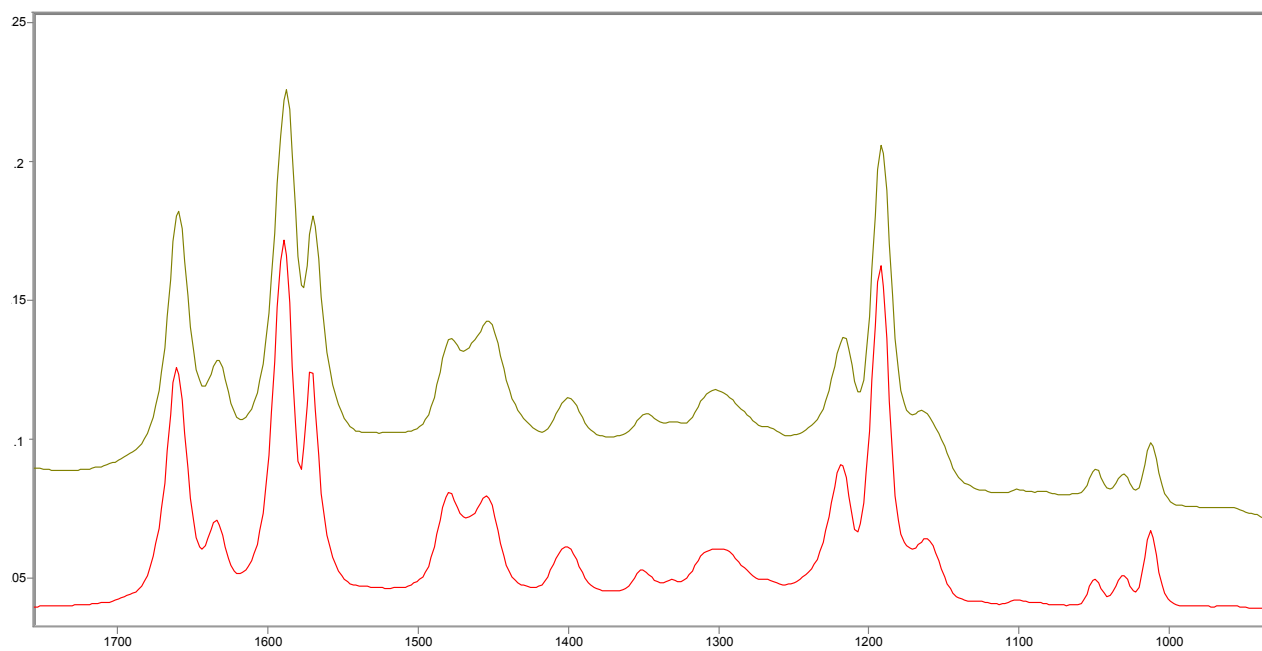

**Fig. 4SI.** The Raman spectra of the alizarin form I (olive) and form II (red) crystals in the range 1700-1000  $\text{cm}^{-1}$ .

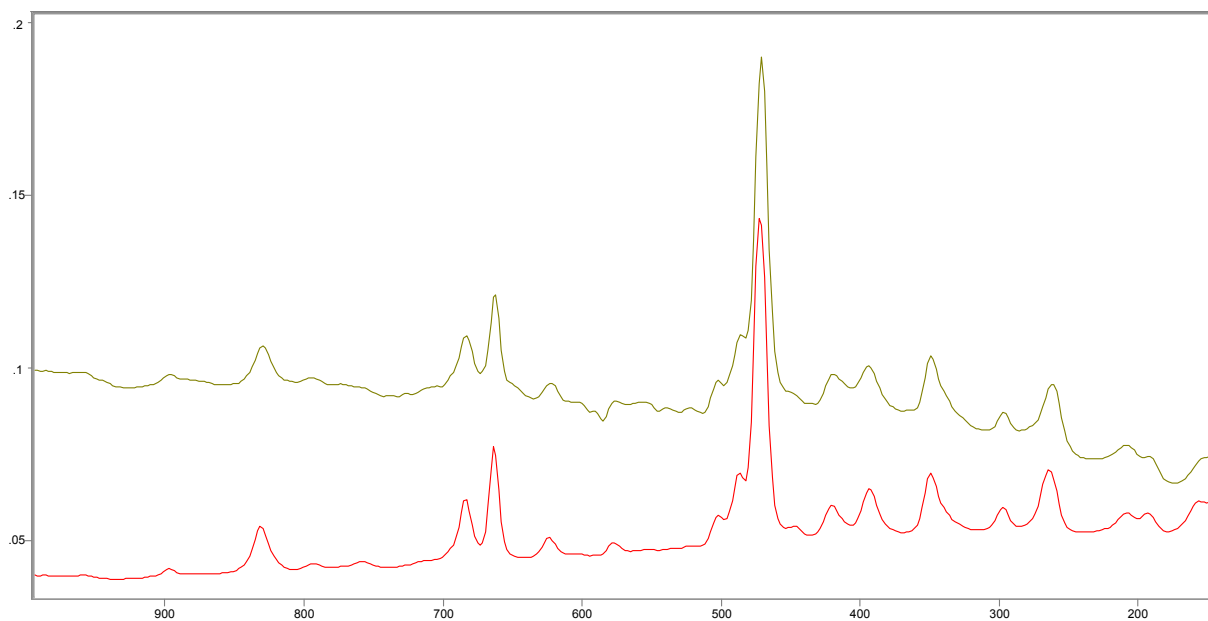

**Figure 5SI.** The Raman spectra of the alizarin form I (olive) and form II (red) crystals in the range 1000-200  $\text{cm}^{-1}$ .

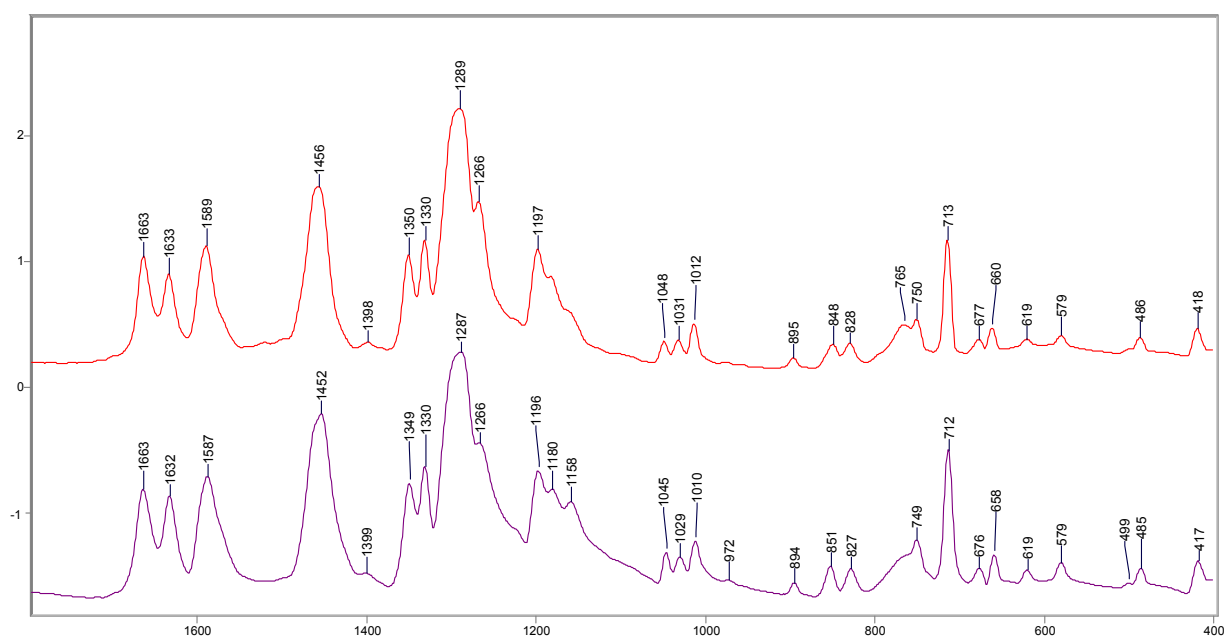

**Figure 6SI.** The IR spectra of the alizarin form I (red) and form II (dark blue) crystals in the range 1700-400  $\text{cm}^{-1}$ .

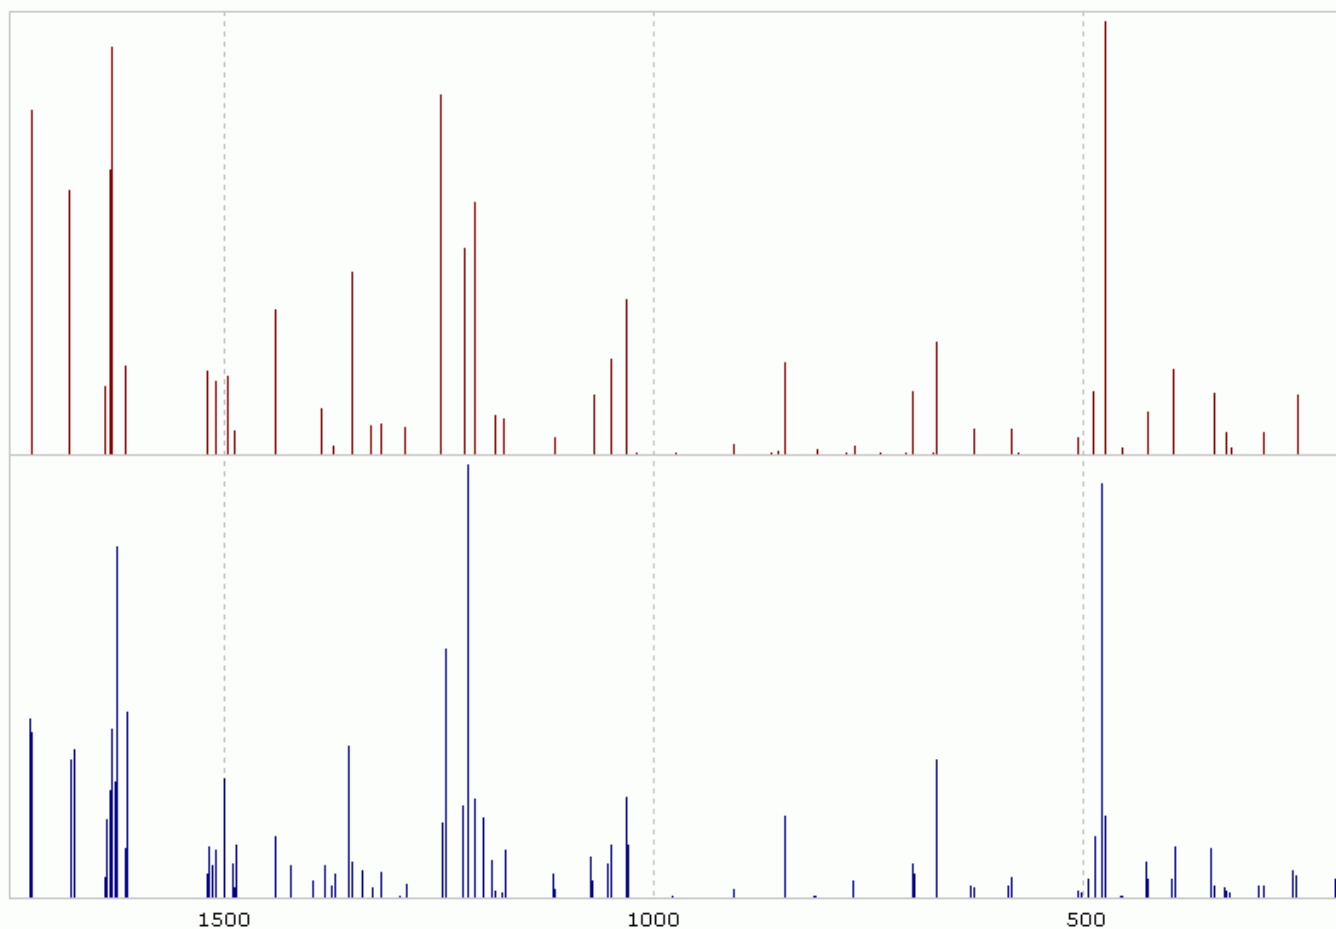

**Fig. 7SI.** Comparison of the Raman theoretical B3LYP/6-31++G\*\* spectra of alizarin monomer (top) and dimer (bottom)

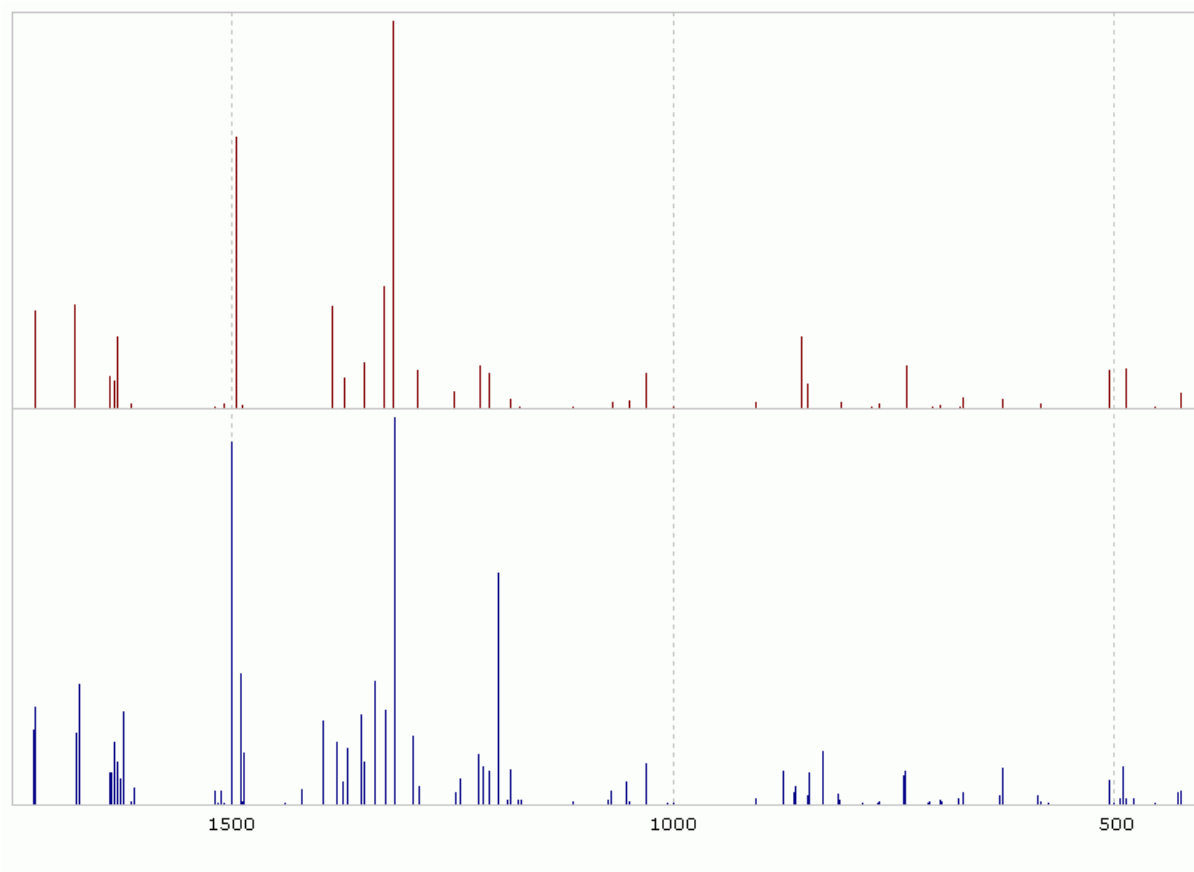

**Fig. 8SI.** Comparison of the IR theoretical B3LYP/6-31++G\*\* spectra of alizarin monomer (top) and dimer (bottom)

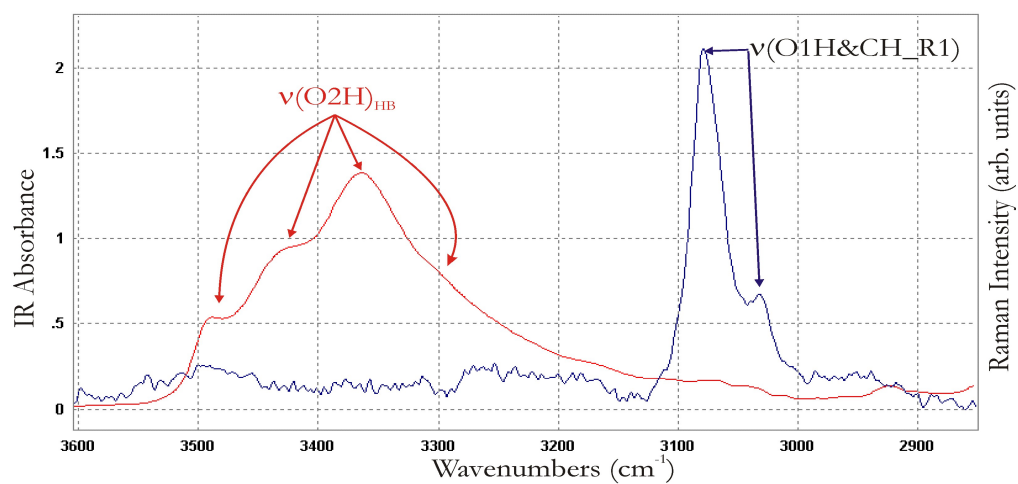

**Fig. 9SI.** The  $\nu(\text{OH})$  and  $\nu(\text{CH})$  region of the experimental IR (red) and Raman (blue) spectra.



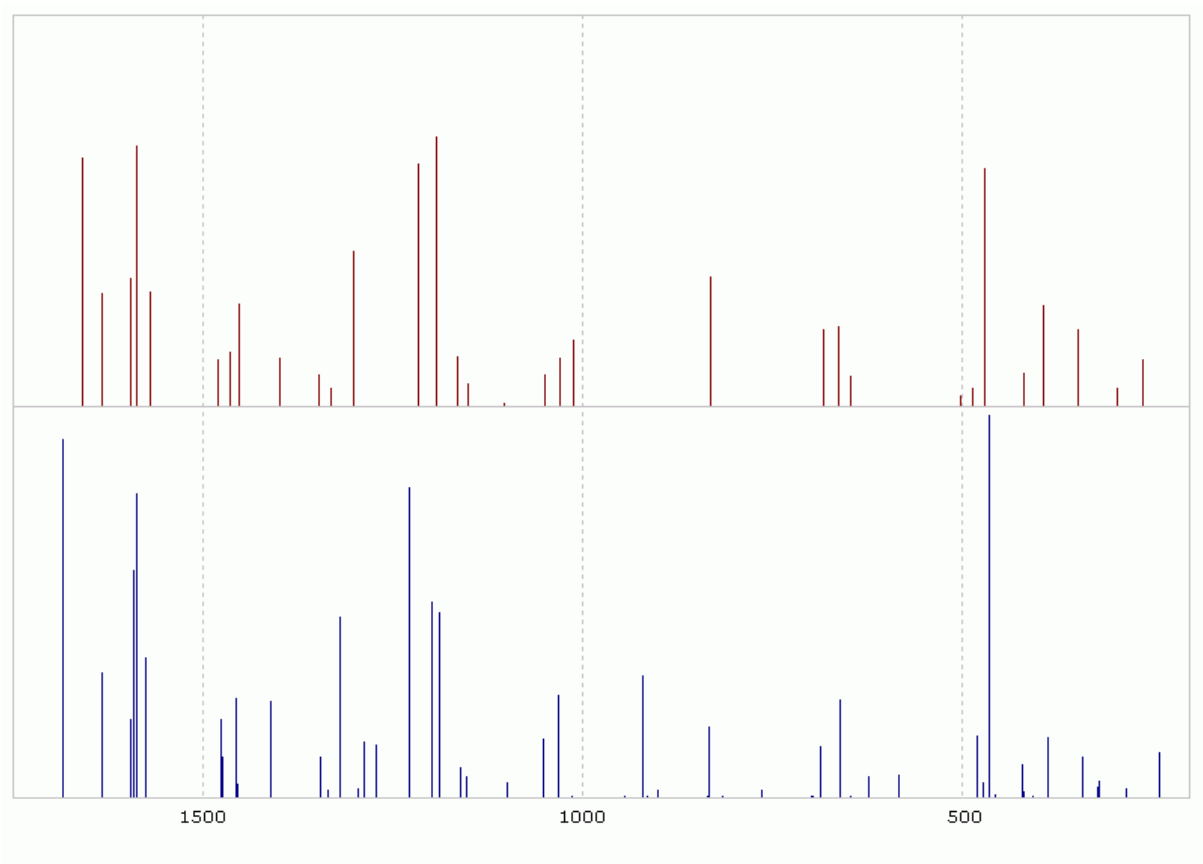

**Figure 10SI.** Comparison of the Raman experimental digitized (top) and theoretical (bottom) spectra of alizarin.

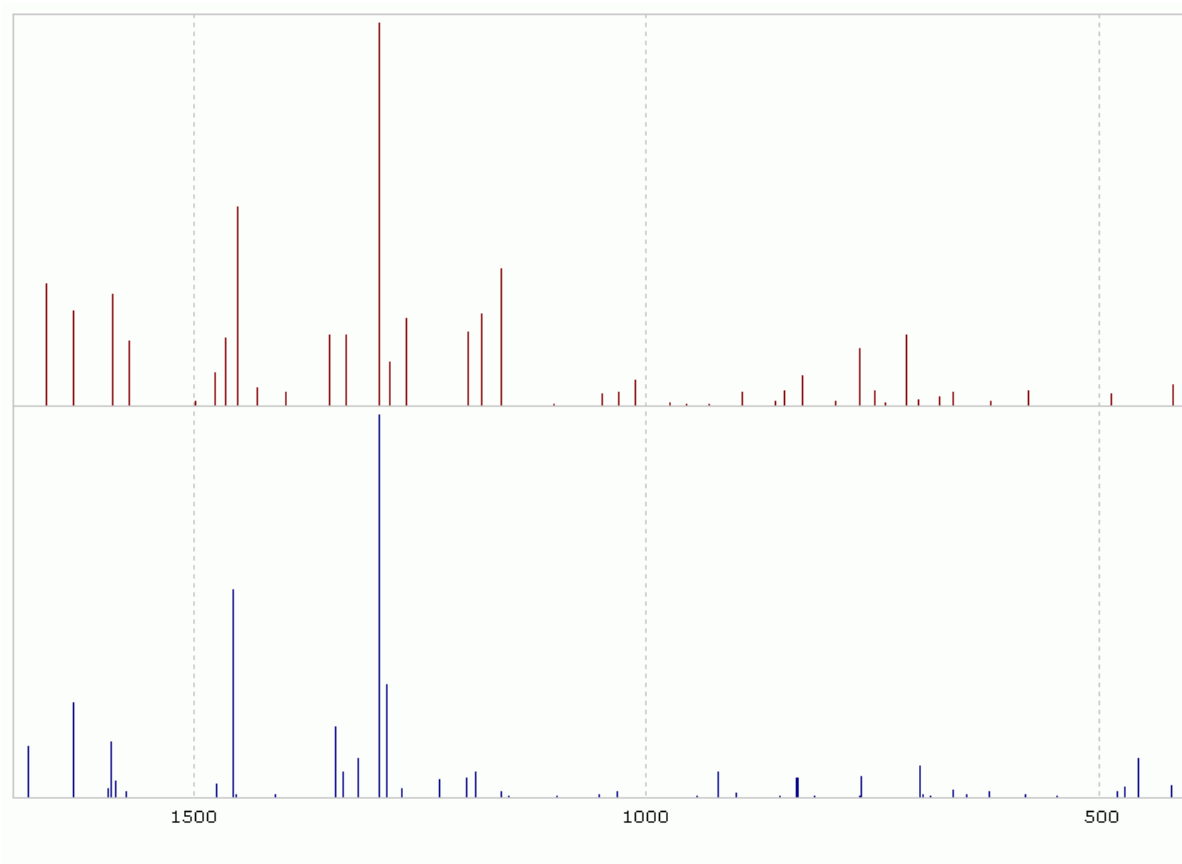

**Figure 11SI.** Comparison of the IR experimental digitized (top) and theoretical (bottom) spectra of alizarin.

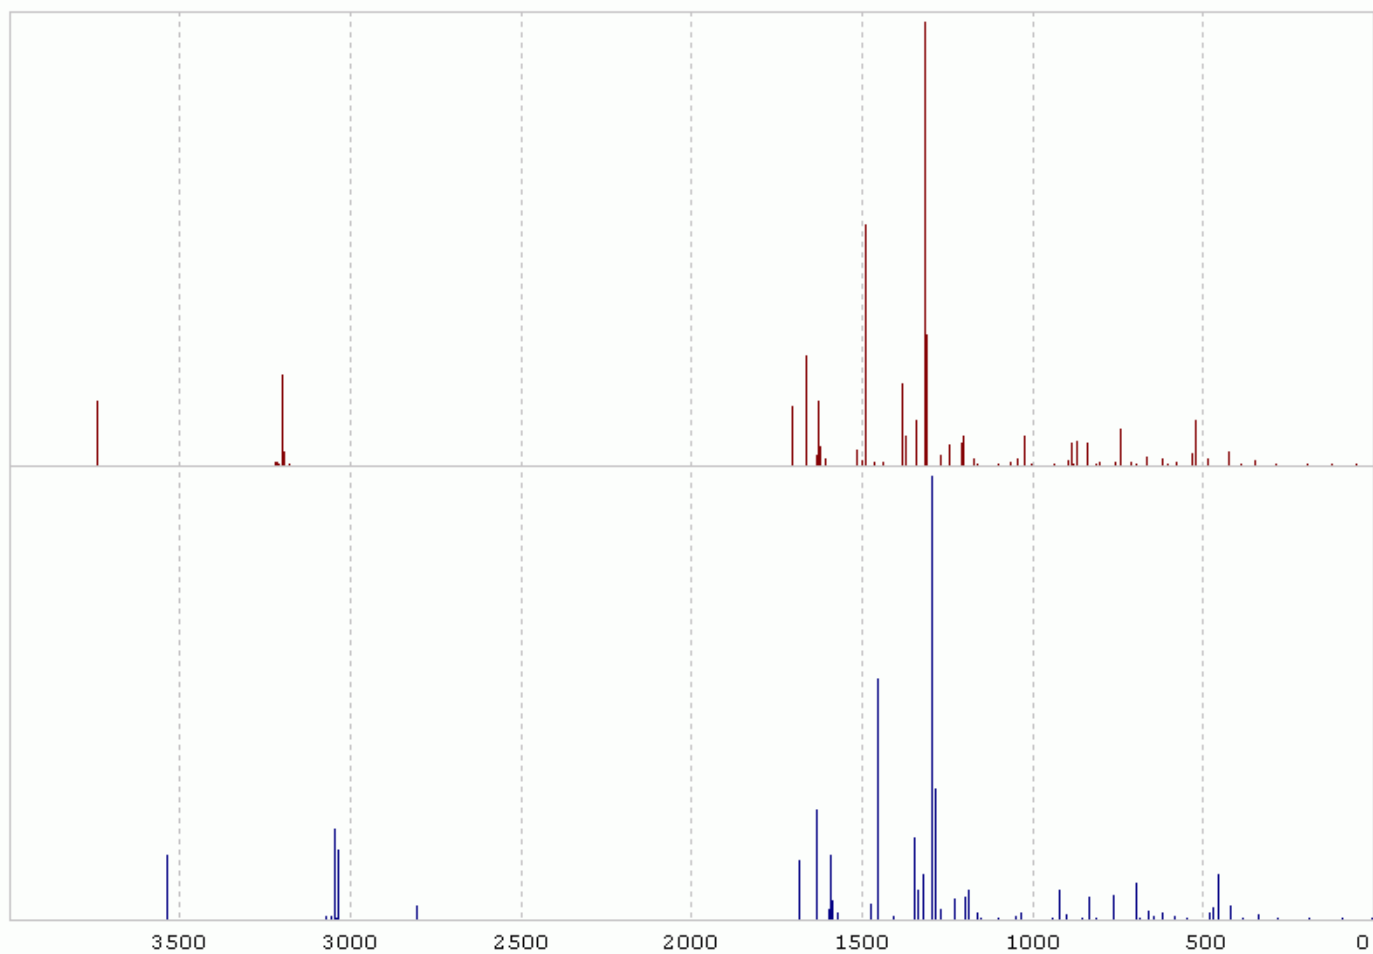

**Fig. 12SI.** Comparison of the IR theoretical harmonic (top, red) and anharmonic (bottom, blue) B3LYP/aug-cc-pVDZ spectra of the alizarin molecule. Observe that in the anharmonic spectrum different bands are shifted by different factors.

**Table 1SI.** The B3LYP/aug-cc-pVDZ calculated fundamental frequencies of the alizarin molecule

| $\nu_{\text{har}}$<br>( $\text{cm}^{-1}$ ) | $\nu_{\text{anh}}$<br>( $\text{cm}^{-1}$ ) | $I_{\text{IR}}$<br>( $\text{km/mol}$ ) | $A_{\text{R}}$<br>( $\text{Å}^4/\text{amu}$ ) | $A_{\text{R}}(\text{ANHAR})$<br>(%) | Symm. | PED<br>(%)                                                                                                        |
|--------------------------------------------|--------------------------------------------|----------------------------------------|-----------------------------------------------|-------------------------------------|-------|-------------------------------------------------------------------------------------------------------------------|
| 3740                                       | 3537                                       | 119.4                                  | 143.2                                         | 7.7                                 | A'    | $\nu(\text{O2-H})100$                                                                                             |
| 3218                                       | 3071                                       | 5.3                                    | 33.7                                          | 2.8                                 | A'    | $85 \nu^{\text{s}}(\text{CH R1}); 14 \nu^{\text{s}}(\text{CH R2})$                                                |
| 3214                                       | 3057                                       | 4.6                                    | 284.1                                         | 24.2                                | A'    | $83 \nu^{\text{s}}(\text{CH R2}); 14 \nu^{\text{s}}(\text{CH R1})$                                                |
| 3212                                       | 3071                                       | 2.4                                    | 82.4                                          | 6.9                                 | A'    | $99 \nu^{\text{a}}_1(\text{CH R2})$                                                                               |
| 3200                                       | 3044                                       | 166.2                                  | 137.7                                         | 11.9                                | A'    | $96 \nu^{\text{a}}_1(\text{O1-H\&CH R1})$                                                                         |
| 3198                                       | 3037                                       | 127.5                                  | 392.6                                         | 34.1                                | A'    | $96 \nu^{\text{a}}_2(\text{O1-H\&CH R1})$                                                                         |
| 3195                                       | 2803                                       | 25.9                                   | 154.2                                         | 16.8                                | A'    | $97 \nu^{\text{a}}_2(\text{CH R2})$                                                                               |
| 3181                                       | 3040                                       | 3.2                                    | 82.8                                          | 7.2                                 | A'    | $98 \nu^{\text{a}}_3(\text{CH R2})$                                                                               |
| 1707                                       | 1683                                       | 109.0                                  | 276.3                                         | 93.7                                | A'    | $80 \nu(\text{C=O4})$                                                                                             |
| 1666                                       | 1633                                       | 201.7                                  | 91.4                                          | 32.8                                | A'    | $67 \nu(\text{C=O3})$                                                                                             |
| 1631                                       | 1595                                       | 17.4                                   | 54.1                                          | 20.3                                | A'    | $60 \nu_1(\text{CC})$                                                                                             |
| 1627                                       | 1591                                       | 117.3                                  | 158.3                                         | 59.5                                | A'    | $50 \nu_2(\text{CC}); 17 \beta(\text{O1-H})$                                                                      |
| 1623                                       | 1586                                       | 35.5                                   | 210.6                                         | 79.7                                | A'    | $62 \nu_3(\text{CC})$                                                                                             |
| 1606                                       | 1574                                       | 11.0                                   | 95.1                                          | 36.5                                | A'    | $67 \nu_4(\text{CC})$                                                                                             |
| 1513                                       | 1475                                       | 26.7                                   | 47.7                                          | 20.5                                | A'    | $54 \nu_5(\text{CC}); 12 \beta_4(\text{CH})$                                                                      |
| 1500                                       | 1474                                       | 7.6                                    | 24.8                                          | 10.7                                | A'    | $41 \beta_1(\text{CH R2}); 20 \nu_{11}(\text{CC})$                                                                |
| 1491                                       | 1456                                       | 443.4                                  | 58.5                                          | 25.8                                | A'    | $54 \nu_6(\text{CC}); 19 \beta(\text{O1-H})$                                                                      |
| 1464                                       | 1453                                       | 5.4                                    | 7.6                                           | 3.4                                 | A'    | $39 \nu_7(\text{CC}); 22 \beta_2(\text{CH}); 12 \beta_6(\text{CH})$                                               |
| 1438                                       | 1410                                       | 4.2                                    | 54.1                                          | 25.2                                | A'    | $42 \nu_8(\text{CC}); 38 \beta(\text{O2-H})$                                                                      |
| 1383                                       | 1344                                       | 151.9                                  | 20.9                                          | 10.5                                | A'    | $24 \beta(\text{O1-H}); 13 \nu_6(\text{CC}); 13 \nu_9(\text{CC}); 11 \nu_{12}(\text{CC}); 10 \beta_8(\text{CCC})$ |
| 1370                                       | 1335                                       | 54.4                                   | 3.7                                           | 1.9                                 | A'    | $68 \nu_9(\text{CC})$                                                                                             |
| 1341                                       | 1319                                       | 81.9                                   | 91.1                                          | 47.4                                | A'    | $44 \nu(\text{C-O1}); 10 \beta_2(\text{CH})$                                                                      |
| 1318                                       | 1295                                       | 816.8                                  | 4.0                                           | 2.1                                 | A'    | $56 \nu(\text{C-O2}); 10 \nu_{10}(\text{CC})$                                                                     |
| 1310                                       | 1287                                       | 241.5                                  | 26.7                                          | 14.5                                | A'    | $39 \nu_{70}(\text{CC}); 17 \beta_4(\text{CH}); 12 \beta(\text{O2-H})$                                            |
| 1271                                       | 1271                                       | 18.6                                   | 24.9                                          | 13.8                                | A'    | $46 \beta_2(\text{CH}); 39 \nu_{10}(\text{CC}); 16 \nu_7(\text{CC})$                                              |
| 1245                                       | 1228                                       | 36.6                                   | 138.8                                         | 81.1                                | A'    | $14 \nu_8(\text{CC}); 19 \beta(\text{O2-H})$                                                                      |
| 1209                                       | 1198                                       | 42.1                                   | 83.9                                          | 51.0                                | A'    | $46 \beta_3(\text{CH})$                                                                                           |
| 1202                                       | 1188                                       | 54.8                                   | 78.8                                          | 48.6                                | A'    | $34 \beta_4(\text{CH}); 11 \nu_1(\text{CC})$                                                                      |
| 1172                                       | 1160                                       | 11.2                                   | 11.9                                          | 7.6                                 | A'    | $81 \beta_5(\text{CH R2}); 14 \nu_{13}(\text{CC})$                                                                |
| 1162                                       | 1152                                       | 3.2                                    | 8.0                                           | 5.2                                 | A'    | $48 \beta_6(\text{CH})$                                                                                           |
| 1103                                       | 1099                                       | 1.1                                    | 5.8                                           | 4.0                                 | A'    | $55 \beta_1(\text{CCC})$                                                                                          |
| 1064                                       | 1052                                       | 4.8                                    | 20.4                                          | 15.2                                | A'    | $56 \nu_{11}(\text{CC}); 21 \beta_1(\text{CH R2})$                                                                |
| 1042                                       | 1032                                       | 11.0                                   | 35.0                                          | 26.8                                | A'    | $45 \nu_{12}(\text{CC}); 13 \beta_1(\text{CCC})$                                                                  |
| 1029                                       | 1014                                       | 0.0                                    | 0.1                                           | 0.1                                 | A''   | $87 \tau_1(\text{CH R2})$                                                                                         |
| 1026                                       | 921                                        | 52.5                                   | 35.4                                          | 32.0                                | A'    | $53 \nu_{13}(\text{CC})$                                                                                          |
| 1001                                       | 944                                        | 1.1                                    | 0.1                                           | 0.1                                 | A''   | $86 \tau_2(\text{CH})$                                                                                            |
| 997                                        | 915                                        | 0.4                                    | 0.2                                           | 0.2                                 | A''   | $87 \tau_3(\text{CH R1})$                                                                                         |
| 935                                        | 853                                        | 1.1                                    | 0.0                                           | 0.0                                 | A''   | $69 \tau_4(\text{CH R2}); 18 \tau(\text{C=O3})$                                                                   |
| 897                                        | 900                                        | 8.4                                    | 1.9                                           | 1.8                                 | A'    | $63 \beta_2(\text{CCC})$                                                                                          |
| 885                                        | 834                                        | 41.1                                   | 0.2                                           | 0.2                                 | A''   | $36 \tau(\text{C=O3}); 25 \tau(\text{O1-H}); 12 \tau_4(\text{CH R2})$                                             |
| 879                                        | 815                                        | 2.2                                    | 0.2                                           | 0.2                                 | A''   | $64 \tau_5(\text{CH R1\&O1-H}); 11 \tau(\text{C=O3\&C=O4})$                                                       |
| 868                                        | 763                                        | 44.8                                   | 0.6                                           | 0.7                                 | A''   | $56 \tau(\text{O1-H}); 16 \tau(\text{C=O3})$                                                                      |
| 841                                        | 833                                        | 39.8                                   | 17.8                                          | 18.5                                | A'    | $59 \nu_{14}(\text{CC})$                                                                                          |
| 816                                        | 764                                        | 2.4                                    | 1.0                                           | 1.2                                 | A''   | $36 \tau(\text{C=O3\&C=O4}); 34 \tau_6(\text{CH R2})$                                                             |

|     |     |      |      |       |     |                                                                      |
|-----|-----|------|------|-------|-----|----------------------------------------------------------------------|
| 806 | 695 | 4.9  | 0.1  | 0.1   | A'' | 75 $\tau_1$ (CCCC)                                                   |
| 757 | 763 | 6.4  | 1.6  | 1.9   | A'  | 68 $\beta_3$ (CCC)                                                   |
| 741 | 697 | 65.7 | 0.3  | 0.4   | A'' | 57 $\tau_6$ (CH <sub>2</sub> R <sub>2</sub> ); 30 $\tau$ (C=O3&C=O4) |
| 713 | 647 | 6.3  | 0.1  | 0.1   | A'' | 79 $\tau_2$ (CCCC)                                                   |
| 694 | 686 | 3.0  | 9.9  | 13.4  | A'  | 79 $\beta_4$ (CCC)                                                   |
| 668 | 661 | 15.3 | 18.0 | 25.6  | A'  | 71 $\beta_5$ (CCC)                                                   |
| 620 | 622 | 11.5 | 3.5  | 5.4   | A'  | 61 $\beta_6$ (CCC)                                                   |
| 605 | 547 | 0.7  | 0.0  | 0.0   | A'' | 83 $\tau_3$ (CCCC)                                                   |
| 577 | 582 | 5.7  | 3.5  | 5.9   | A'  | 56 $\beta_7$ (CCC)                                                   |
| 532 | 472 | 22.8 | 1.8  | 3.9   | A'' | 51 $\tau_4$ (CCCC); 36 $\tau$ (O2-H)                                 |
| 522 | 456 | 84.3 | 0.3  | 0.7   | A'' | 59 $\tau$ (O2-H); 29 $\tau_4$ (CCCC)                                 |
| 484 | 480 | 12.2 | 7.5  | 15.9  | A'  | 63 $\beta_1$ (CCO)                                                   |
| 472 | 464 | 0.3  | 45.2 | 100.0 | A'  | 68 $\nu$ (quinone)                                                   |
| 470 | 418 | 0.2  | 0.5  | 1.3   | A'' | 80 $\tau_5$ (CCCC)                                                   |
| 437 | 406 | 0.2  | 0.1  | 0.3   | A'' | 83 $\tau_6$ (CCCC)                                                   |
| 425 | 420 | 24.2 | 3.5  | 8.7   | A'  | 62 $\beta_8$ (CCC)                                                   |
| 389 | 386 | 3.7  | 5.7  | 15.7  | A'  | 60 $\beta_9$ (CCC); 11 $\nu_{10}$ (CC)                               |
| 346 | 340 | 7.3  | 3.3  | 10.5  | A'  | 81 $\beta_2$ (CCO)                                                   |
| 342 | 320 | 0.5  | 1.2  | 4.1   | A'' | 91 $\tau_7$ (CCCC)                                                   |
| 328 | 321 | 0.2  | 0.8  | 2.7   | A'  | 79 $\nu$ (accordion)                                                 |
| 286 | 283 | 1.4  | 0.6  | 2.4   | A'  | 81 $\beta_{10}$ (CCC)                                                |
| 271 | 239 | 0.0  | 2.5  | 11.9  | A'' | 88 $\tau_8$ (CCCC)                                                   |
| 196 | 190 | 0.6  | 0.3  | 1.8   | A'  | 74 $\beta_{11}$ (CCC)                                                |
| 188 | 166 | 0.1  | 0.6  | 4.2   | A'' | 83 $\tau_9$ (CCCC)                                                   |
| 147 | 131 | 0.2  | 0.3  | 2.7   | A'' | 87 $\tau_{10}$ (CCCC)                                                |
| 125 | 92  | 1.2  | 1.2  | 16.0  | A'' | 82 $\tau_{11}$ (CCCC)                                                |
| 95  | 62  | 0.4  | 0.3  | 6.2   | A'' | 86 $\tau_{12}$ (CCCC)                                                |
| 49  | 6   | 2.9  | 0.1  | 83.1  | A'' | 90 $\tau$ (Butterfly)                                                |

**Table 2SI.** The parameters of experimental FT-IR and FT-Raman spectra of alizarin in polycrystalline powder

| IR      |                      |                      |       | Raman |                      |                      |       | Calculations        |                      |                             |
|---------|----------------------|----------------------|-------|-------|----------------------|----------------------|-------|---------------------|----------------------|-----------------------------|
| Freq    | I <sub>INT</sub> (%) | I <sub>max</sub> (%) | FWHM  | Freq  | I <sub>INT</sub> (%) | I <sub>max</sub> (%) | FWHM  | Freq <sub>anh</sub> | I <sub>INT</sub> (%) | I <sup>REL,anh</sup><br>(%) |
| 3491    | 8.80                 | 7.20                 | 31.8  |       |                      |                      |       | 3537                | 14.62                | 7.7                         |
| 3436    | 31.31                | 13.60                | 70.3  |       |                      |                      |       |                     |                      |                             |
| 3366    | 61.82                | 21.40                | 73.8  |       |                      |                      |       |                     |                      |                             |
| 3307    | 44.65                | 10.40                | 116.9 |       |                      |                      |       |                     |                      |                             |
|         |                      |                      |       |       |                      |                      |       | 3071                | 0.65                 | 2.8                         |
|         |                      |                      |       | 3077  | 61.70                | 30.86                | 30.3  | 3071                | 0.29                 | 6.9                         |
|         |                      |                      |       |       |                      |                      |       | 3057                | 0.56                 | 24.2                        |
| 3060    | 4.69                 | 2.00                 | 75.6  |       |                      |                      |       |                     |                      |                             |
|         |                      |                      |       | 3035  | 14.49                | 7.41                 | 33.0  | 3044                | 20.35                | 11.9                        |
|         |                      |                      |       |       |                      |                      |       | 3040                | 0.39                 | 7.2                         |
|         |                      |                      |       |       |                      |                      |       | 3037                | 15.61                | 34.1                        |
|         |                      |                      |       |       |                      |                      |       | 2803                | 3.17                 | 16.8                        |
| 1663    | 31.84                | 45.40                | 19.4  | 1658  | 64.83                | 62.96                | 14.3  | 1683                | 13.34                | 93.7                        |
| 1633    | 24.83                | 34.20                | 16.9  | 1632  | 29.45                | 22.22                | 16.5  | 1633                | 24.69                | 32.8                        |
|         |                      |                      |       | 1595  | 33.38                | 24.69                | 19.0  | 1595                | 2.13                 | 20.3                        |
| 1590    | 29.09                | 46.20                | 19.4  | 1587  | 68.28                | 82.72                | 12.9  | 1591                | 14.36                | 59.5                        |
|         |                      |                      |       |       |                      |                      |       | 1586                | 4.35                 | 79.7                        |
| 1571 sh | 17.03                | 16.60                | 24.3  | 1569  | 29.92                | 49.38                | 8.7   | 1574                | 1.35                 | 36.5                        |
| 1498??? | 1.00                 |                      |       |       |                      |                      |       |                     |                      |                             |
| 1477    | 8.65                 | 18.40                | 14.5  | 1478  | 22.10                | 14.81                | 15.00 | 1475                | 3.27                 | 20.5                        |
|         |                      |                      |       |       |                      |                      |       | 1474                | 0.93                 | 10.7                        |
| 1465 sh | 17.58                | 37.00                | 14.6  | 1463  | 14.16                | 13.58                | 13.2  |                     |                      |                             |
| 1452    | 52.06                | 67.40                | 21.2  | 1451  | 26.80                | 23.46                | 17.7  | 1456                | 54.29                | 25.8                        |
|         |                      |                      |       |       |                      |                      |       | 1453                | 0.66                 | 3.4                         |
| 1429    | 4.64                 | 8.00                 | 17.7  |       |                      |                      |       |                     |                      |                             |
| 1398    | 3.51                 | 4.60                 | 19.2  | 1399  | 12.50                | 12.35                | 17.5  | 1410                | 0.51                 | 25.2                        |
| 1350    | 18.50                | 39.20                | 14.5  | 1347  | 8.18                 | 8.64                 | 15.8  | 1344                | 18.60                | 10.5                        |
| 1332    | 18.30                | 46.20                | 12.1  | 1331  | 4.65                 | 6.17                 | 13.3  | 1335                | 6.66                 | 1.9                         |
|         |                      |                      |       |       |                      |                      |       | 1319                | 10.03                | 47.4                        |
| 1295    | 100.00               | 100.00               | 30.7  | 1302  | 40.49                | 19.75                | 34.9  | 1295                | 100.00               | 2.1                         |
| 1283 sh | 11.28                | 30.00                | 11.5  |       |                      |                      |       | 1287                | 29.57                | 14.5                        |

|      |       |       |      |      |        |        |      |      |      |       |
|------|-------|-------|------|------|--------|--------|------|------|------|-------|
| 1266 | 22.72 | 41.00 | 14.8 |      |        |        |      | 1271 | 2.28 | 13.8  |
|      |       |       |      | 1216 | 63.50  | 40.74  | 21.2 | 1228 | 4.48 | 81.1  |
| 1198 | 19.27 | 39.60 | 15.0 |      |        |        |      | 1198 | 5.15 | 51.0  |
|      |       |       |      | 1191 | 70.35  | 93.83  | 12.7 | 1188 | 6.71 | 48.6  |
| 1182 | 23.78 | 36.60 | 20.0 |      |        |        |      |      |      |       |
| 1160 | 35.72 | 34.00 | 31.7 | 1164 | 12.77  | 13.58  | 16.5 | 1160 | 1.37 | 7.6   |
|      |       |       |      | 1150 | 5.92   | 7.41   | 11.2 | 1152 | 0.39 | 5.2   |
| 1102 | 0.42  | 1.20  | 10.8 | 1102 | 0.80   | 1.23   | 5.5  | 1099 | 0.13 | 4.0   |
| 1048 | 3.21  | 10.20 | 9.7  | 1048 | 8.18   | 12.35  | 9.5  | 1052 | 0.59 | 15.2  |
| 1031 | 3.59  | 9.80  | 11.3 | 1030 | 12.57  | 13.58  | 12.9 | 1032 | 1.35 | 26.8  |
| 1012 | 6.61  | 19.20 | 10.5 | 1012 | 17.15  | 23.46  | 10.0 | 1014 | 0.00 | 0.1   |
| 974  | 0.78  | 1.60  | 15.5 |      |        |        |      |      |      |       |
| 955  | 0.22  | 0.80  | 9.2  |      |        |        |      |      |      |       |
| 931  | 0.28  | 0.80  | 10.2 |      |        |        |      | 921  | 6.43 | 32.0  |
| 895  | 3.52  | 6.60  | 13.6 |      |        |        |      | 900  | 1.03 | 1.8   |
| 858  | 0.86  | 3.40  | 7.9  |      |        |        |      | 853  | 0.13 | 0.0   |
| 848  | 3.91  | 11.60 | 10.3 |      |        |        |      | 834  | 5.03 | 0.2   |
| 828  | 7.69  | 12.80 | 15.9 | 830  | 33.84  | 16.05  | 25.8 | 833  | 4.87 | 18.5  |
| 792  | 1.23  | 2.60  | 15.1 |      |        |        |      |      |      |       |
| 765  | 14.90 | 17.60 | 26.0 |      |        |        |      | 763  | 5.48 | 0.7   |
| 748  | 4.00  | 12.00 | 10.2 |      |        |        |      | 763  | 0.78 | 1.9   |
| 736  | 0.47  | 1.60  | 6.8  |      |        |        |      |      |      |       |
| 713  | 18.36 | 56.40 | 10.0 |      |        |        |      | 697  | 8.04 | 0.4   |
| 700  | 1.62  | 3.80  | 9.6  |      |        |        |      | 695  | 0.60 | 0.1   |
| 677  | 2.07  | 6.00  | 9.9  | 682  | 20.08  | 18.52  | 13.3 | 686  | 0.37 | 13.4  |
| 660  | 3.45  | 12.40 | 8.5  | 662  | 20.94  | 35.80  | 7.3  | 661  | 1.87 | 25.6  |
|      |       |       |      | 646  | 7.65   | 7.41   | 14.7 | 647  | 0.77 | 0.1   |
| 620  | 0.87  | 2.60  | 10.0 |      |        |        |      | 622  | 1.41 | 5.4   |
| 579  | 3.69  | 6.80  | 13.2 |      |        |        |      | 582  | 0.70 | 5.9   |
|      |       |       |      | 501  | 2.79   | 7.41   | 6.2  |      |      |       |
| 486  | 3.07  | 9.00  | 10.3 | 486  | 4.52   | 9.88   | 8.1  | 480  | 1.49 | 15.9  |
|      |       |       |      | 470  | 62.37  | 100.00 | 8.5  | 464  | 0.04 | 100.0 |
| 419  | 5.27  | 15.40 | 10.5 | 419  | 8.38   | 8.64   | 12.0 | 420  | 2.96 | 8.7   |
|      |       |       |      | 392  | 26.26  | 13.58  | 24.6 | 386  | 0.45 | 15.7  |
|      |       |       |      | 347  | 19.88  | 16.05  | 15.2 | 340  | 0.89 | 10.5  |
|      |       |       |      | 296  | 4.39   | 4.94   | 10.5 | 283  | 0.17 | 2.4   |
|      |       |       |      | 261  | 11.97  | 16.05  | 13.0 |      |      |       |
|      |       |       |      | 193  | 100.00 | 58.02  | 30.1 | 190  | 0.07 | 1.8   |
|      |       |       |      | 182  | 26.40  | 48.15  | 9.7  |      |      |       |
|      |       |       |      | 169  | 38.76  | 48.15  | 13.6 | 166  | 0.01 | 4.2   |

Table 3SI. Definitions of the local coordinates for PED analysis of alizarin calculated at the B3LYP/aug-cc-pVDZ level.

| coord. | coef. | inter mode type | Atom |     |     |     | frag ment | Geom. value | Freq 1       | Freq 2      | Freq 3 | Notati                                     |
|--------|-------|-----------------|------|-----|-----|-----|-----------|-------------|--------------|-------------|--------|--------------------------------------------|
|        |       |                 | No1  | No2 | No3 | No4 |           |             |              |             |        |                                            |
| s 1    | 1.00  | STRE            | 16   | 20  |     |     | OH        | 0.970410    | f3740<br>100 |             |        | v(O2-H                                     |
| s 2    | 1.00  | STRE            | 3    | 21  |     |     | CH        | 1.089395    | f3218<br>85  | f3214<br>14 |        | v <sup>s</sup> (CH_                        |
|        | 3.00  |                 | 4    | 22  |     |     | CH        | 1.087996    |              |             |        |                                            |
| s 3    | 1.00  | STRE            | 5    | 23  |     |     | CH        | 1.088567    | f3214<br>83  | f3218<br>14 |        | v <sup>s</sup> (CH_                        |
|        | 1.00  |                 | 6    | 24  |     |     | CH        | 1.090330    |              |             |        |                                            |
|        | 1.00  |                 | 7    | 25  |     |     | CH        | 1.090156    |              |             |        |                                            |
|        | 2.00  |                 | 8    | 26  |     |     | CH        | 1.088349    |              |             |        |                                            |
| s 4    | -3.00 | STRE            | 5    | 23  |     |     | CH        | 1.088567    | f3212<br>99  |             |        | v <sup>a</sup> <sub>1</sub> (CH_           |
|        | -1.00 |                 | 6    | 24  |     |     | CH        | 1.090330    |              |             |        |                                            |
|        | 1.00  |                 | 8    | 26  |     |     | CH        | 1.088349    |              |             |        |                                            |
| s 5    | -2.00 | STRE            | 3    | 21  |     |     | CH        | 1.089395    | f3200<br>96  |             |        | v <sup>a</sup> <sub>1</sub> (O1-<br>H&CH R |
|        | 1.00  |                 | 4    | 22  |     |     | CH        | 1.087996    |              |             |        |                                            |
|        | 2.00  |                 | 15   | 19  |     |     | OH        | 0.996409    |              |             |        |                                            |
| s 6    | 2.00  | STRE            | 3    | 21  |     |     | CH        | 1.089395    | f3198<br>96  |             |        | v <sup>a</sup> <sub>2</sub> (O1-<br>H&CH R |
|        | -1.00 |                 | 4    | 22  |     |     | CH        | 1.087996    |              |             |        |                                            |
|        | 2.00  |                 | 15   | 19  |     |     | OH        | 0.996409    |              |             |        |                                            |
| s 7    | -1.00 | STRE            | 5    | 23  |     |     | CH        | 1.088567    | f3195<br>97  |             |        | v <sup>a</sup> <sub>2</sub> (CH_           |
|        | 2.00  |                 | 6    | 24  |     |     | CH        | 1.090330    |              |             |        |                                            |
|        | 3.00  |                 | 7    | 25  |     |     | CH        | 1.090156    |              |             |        |                                            |
|        | -1.00 |                 | 8    | 26  |     |     | CH        | 1.088349    |              |             |        |                                            |
| s 8    | -1.00 | STRE            | 6    | 24  |     |     | CH        | 1.090330    | f3181<br>98  |             |        | v <sup>a</sup> <sub>3</sub> (CH_           |
|        | 1.00  |                 | 7    | 25  |     |     | CH        | 1.090156    |              |             |        |                                            |
| s 9    | 1.00  | STRE            | 18   | 10  |     |     | OC        | 1.227412    | f1707<br>80  |             |        | v(C=O4                                     |
| s 10   | 1.00  | STRE            | 17   | 9   |     |     | OC        | 1.246636    | f1666<br>67  |             |        | v(C=O3                                     |
| s 11   | 3.00  | STRE            | 2    | 3   |     |     | CC        | 1.392095    | f1631<br>60  | f1202<br>11 |        | v <sub>1</sub> (CC)                        |
|        | -2.00 |                 | 4    | 14  |     |     | CC        | 1.394778    |              |             |        |                                            |
|        | 2.00  |                 | 5    | 6   |     |     | CC        | 1.394906    |              |             |        |                                            |
|        | -1.00 |                 | 16   | 2   |     |     | OC        | 1.355710    |              |             |        |                                            |
|        | -1.00 |                 | 17   | 9   |     |     | OC        | 1.246636    |              |             |        |                                            |
|        | -1.00 |                 | 18   | 10  |     |     | OC        | 1.227412    |              |             |        |                                            |
| s 12   | 1.00  | STRE            | 1    | 2   |     |     | CC        | 1.414741    | f1627<br>50  |             |        | v <sub>2</sub> (CC)                        |
|        | -1.00 |                 | 1    | 13  |     |     | CC        | 1.406723    |              |             |        |                                            |
|        | 1.00  |                 | 2    | 3   |     |     | CC        | 1.392095    |              |             |        |                                            |



|      |            |      |    |    |    |  |     |          |             |             |             |                                   |
|------|------------|------|----|----|----|--|-----|----------|-------------|-------------|-------------|-----------------------------------|
|      | -1.00      |      | 3  | 4  |    |  | CC  | 1.399714 |             |             |             |                                   |
|      | 1.00       |      | 4  | 14 |    |  | CC  | 1.394778 |             |             |             |                                   |
|      | 1.00       |      | 18 | 10 |    |  | OC  | 1.227412 |             |             |             |                                   |
| s 13 | -3.00      | STRE | 2  | 3  |    |  | CC  | 1.392095 | f1623<br>62 |             |             | v <sub>3</sub> (CC)               |
|      | 3.00       |      | 4  | 14 |    |  | CC  | 1.394778 |             |             |             |                                   |
|      | -4.00      |      | 5  | 11 |    |  | CC  | 1.401102 |             |             |             |                                   |
|      | -5.00      |      | 7  | 8  |    |  | CC  | 1.393725 |             |             |             |                                   |
|      | 3.00       |      | 17 | 9  |    |  | OC  | 1.246636 |             |             |             |                                   |
| s 14 | 1.00       | STRE | 4  | 14 |    |  | CC  | 1.394778 | f1606<br>67 |             |             | v <sub>4</sub> (CC)               |
|      | 1.00       |      | 5  | 6  |    |  | CC  | 1.394906 |             |             |             |                                   |
|      | -1.00      |      | 6  | 7  |    |  | CC  | 1.401921 |             |             |             |                                   |
|      | -1.00      |      | 11 | 12 |    |  | CC  | 1.411714 |             |             |             |                                   |
|      | 1.00       |      | 17 | 9  |    |  | OC  | 1.246636 |             |             |             |                                   |
|      | 1.00       |      | 18 | 10 |    |  | OC  | 1.227412 |             |             |             |                                   |
| s 15 | -2.00      | STRE | 2  | 3  |    |  | CC  | 1.392095 | f1513<br>54 |             |             | v <sub>5</sub> (CC)               |
|      | -5.00      |      | 3  | 4  |    |  | CC  | 1.399714 |             |             |             |                                   |
|      | -1.00      |      | 9  | 13 |    |  | CC  | 1.467399 |             |             |             |                                   |
|      | 8.00       |      | 13 | 14 |    |  | CC  | 1.421718 |             |             |             |                                   |
|      | -5.00      |      | 17 | 9  |    |  | OC  | 1.246636 |             |             |             |                                   |
| s 16 | 1.00       | BEND | 23 | 5  | 11 |  | HCC | 118.40   | f1500<br>41 | f1064<br>21 |             | β <sub>1</sub> (CH <sub>2</sub> ) |
|      | 1.00       |      | 24 | 6  | 5  |  | HCC | 119.84   |             |             |             |                                   |
|      | 1.00       |      | 25 | 7  | 8  |  | HCC | 119.93   |             |             |             |                                   |
|      | 1.00       |      | 26 | 8  | 12 |  | HCC | 118.77   |             |             |             |                                   |
| s 17 | -<br>10.00 | STRE | 1  | 13 |    |  | CC  | 1.406723 | f1491<br>54 | f1383<br>13 |             | v <sub>6</sub> (CC)               |
|      | 8.00       |      | 3  | 4  |    |  | CC  | 1.399714 |             |             |             |                                   |
|      | -2.00      |      | 9  | 12 |    |  | CC  | 1.483478 |             |             |             |                                   |
|      | 4.00       |      | 9  | 13 |    |  | CC  | 1.467399 |             |             |             |                                   |
|      | 7.00       |      | 15 | 1  |    |  | OC  | 1.348683 |             |             |             |                                   |
|      | 5.00       |      | 16 | 2  |    |  | OC  | 1.355710 |             |             |             |                                   |
| s 18 | -1.00      | STRE | 5  | 6  |    |  | CC  | 1.394906 | f1464<br>39 | f1271<br>16 |             | v <sub>7</sub> (CC)               |
|      | -1.00      |      | 5  | 11 |    |  | CC  | 1.401102 |             |             |             |                                   |
|      | 1.00       |      | 7  | 8  |    |  | CC  | 1.393725 |             |             |             |                                   |
|      | 1.00       |      | 8  | 12 |    |  | CC  | 1.403283 |             |             |             |                                   |
|      | -1.00      |      | 9  | 12 |    |  | CC  | 1.483478 |             |             |             |                                   |
| s 19 | -1.00      | STRE | 1  | 2  |    |  | CC  | 1.414741 | f1245<br>14 | f1438<br>42 |             | v <sub>8</sub> (CC)               |
|      | 1.00       |      | 2  | 3  |    |  | CC  | 1.392095 |             |             |             |                                   |
|      | 2.00       |      | 4  | 14 |    |  | CC  | 1.394778 |             |             |             |                                   |
|      | -1.00      |      | 10 | 14 |    |  | CC  | 1.483912 |             |             |             |                                   |
|      | -1.00      |      | 13 | 14 |    |  | CC  | 1.421718 |             |             |             |                                   |
| s 20 | 1.00       | BEND | 20 | 16 | 2  |  | HOC | 108.19   | f1438<br>38 | f1245<br>19 | f1310<br>12 | β (O2-H)                          |
| s 21 | 1.00       | BEND | 19 | 15 | 1  |  | HOC | 105.97   | f1383<br>24 | f1491<br>19 | f1627<br>17 | β (O1-H)                          |
| s 22 | 1.00       | STRE | 5  | 6  |    |  | CC  | 1.394906 | f1370<br>68 | f1383<br>13 |             | v <sub>9</sub> (CC)               |
|      | -1.00      |      | 5  | 11 |    |  | CC  | 1.401102 |             |             |             |                                   |
|      | -1.00      |      | 6  | 7  |    |  | CC  | 1.401921 |             |             |             |                                   |

|      |       |      |    |    |    |  |     |          |             |             |             |                      |
|------|-------|------|----|----|----|--|-----|----------|-------------|-------------|-------------|----------------------|
|      | 1.00  |      | 7  | 8  |    |  | CC  | 1.393725 |             |             |             |                      |
|      | -1.00 |      | 8  | 12 |    |  | CC  | 1.403283 |             |             |             |                      |
|      | 1.00  |      | 11 | 12 |    |  | CC  | 1.411714 |             |             |             |                      |
| s 23 | 1.00  | STRE | 15 | 1  |    |  | OC  | 1.348683 | f1341<br>44 |             |             | v (C-O1)             |
| s 24 | 1.00  | STRE | 16 | 2  |    |  | OC  | 1.355710 | f1318<br>56 |             |             | v (C-O2)             |
| s 25 | -1.00 | STRE | 10 | 11 |    |  | CC  | 1.498389 | f1310<br>39 | f389<br>11  | f1318<br>10 | v <sub>10</sub> (CC) |
|      | 1.00  |      | 10 | 14 |    |  | CC  | 1.483912 |             |             |             |                      |
| s 26 | -2.00 | BEND | 19 | 15 | 1  |  | HOC | 105.97   | f1271<br>46 | f1464<br>22 | f1341<br>10 | β <sub>2</sub> (CH)  |
|      | -3.00 |      | 22 | 4  | 14 |  | HCC | 118.62   |             |             |             |                      |
|      | 3.00  |      | 25 | 7  | 8  |  | HCC | 119.93   |             |             |             |                      |
|      | 6.00  |      | 26 | 8  | 12 |  | HCC | 118.77   |             |             |             |                      |
| s 27 | -1.00 | BEND | 20 | 16 | 2  |  | HOC | 108.19   | f1209<br>46 |             |             | β <sub>3</sub> (CH)  |
|      | -1.00 |      | 21 | 3  | 2  |  | HCC | 118.68   |             |             |             |                      |
|      | 1.00  |      | 22 | 4  | 3  |  | HCC | 120.59   |             |             |             |                      |
|      | -1.00 |      | 24 | 6  | 5  |  | HCC | 119.84   |             |             |             |                      |
|      | -1.00 |      | 26 | 8  | 12 |  | HCC | 118.77   |             |             |             |                      |
| s 28 | 2.00  | BEND | 20 | 16 | 2  |  | HOC | 108.19   | f1202<br>34 | f1310<br>17 | f1513<br>12 | β <sub>4</sub> (CH)  |
|      | 2.00  |      | 21 | 3  | 2  |  | HCC | 118.68   |             |             |             |                      |
|      | 2.00  |      | 22 | 4  | 3  |  | HCC | 120.59   |             |             |             |                      |
|      | 1.00  |      | 25 | 7  | 6  |  | HCC | 120.03   |             |             |             |                      |
| s 29 | 1.00  | BEND | 23 | 5  | 6  |  | HCC | 121.35   | f1172<br>81 |             |             | β <sub>5</sub> (CH)  |
|      | -1.00 |      | 23 | 5  | 11 |  | HCC | 118.40   |             |             |             |                      |
|      | 2.00  |      | 24 | 6  | 5  |  | HCC | 119.84   |             |             |             |                      |
|      | -2.00 |      | 24 | 6  | 7  |  | HCC | 119.93   |             |             |             |                      |
|      | -2.00 |      | 25 | 7  | 6  |  | HCC | 120.03   |             |             |             |                      |
|      | 2.00  |      | 25 | 7  | 8  |  | HCC | 119.93   |             |             |             |                      |
|      | 1.00  |      | 26 | 8  | 7  |  | HCC | 121.19   |             |             |             |                      |
|      | -1.00 |      | 26 | 8  | 12 |  | HCC | 118.77   |             |             |             |                      |
| s 30 | -1.00 | BEND | 21 | 3  | 4  |  | HCC | 121.11   | f1162<br>48 | f1464<br>12 |             | β <sub>6</sub> (CH)  |
|      | 1.00  |      | 22 | 4  | 14 |  | HCC | 118.62   |             |             |             |                      |
|      | -1.00 |      | 24 | 6  | 5  |  | HCC | 119.84   |             |             |             |                      |
|      | -1.00 |      | 26 | 8  | 12 |  | HCC | 118.77   |             |             |             |                      |
| s 31 | -1.00 | BEND | 6  | 5  | 11 |  | CCC | 120.25   | f1103<br>55 | f1042<br>13 |             | β <sub>1</sub> (CCC) |
|      | 1.00  |      | 7  | 8  | 12 |  | CCC | 120.04   |             |             |             |                      |
| s 32 | 1.00  | STRE | 1  | 2  |    |  | CC  | 1.414741 | f1064<br>56 | f1500<br>20 |             | v <sub>11</sub> (CC) |
|      | -2.00 |      | 4  | 14 |    |  | CC  | 1.394778 |             |             |             |                      |
|      | -3.00 |      | 5  | 6  |    |  | CC  | 1.394906 |             |             |             |                      |
|      | 2.00  |      | 5  | 11 |    |  | CC  | 1.401102 |             |             |             |                      |
|      | -5.00 |      | 6  | 7  |    |  | CC  | 1.401921 |             |             |             |                      |
|      | -3.00 |      | 7  | 8  |    |  | CC  | 1.393725 |             |             |             |                      |
|      | 1.00  |      | 8  | 12 |    |  | CC  | 1.403283 |             |             |             |                      |
|      | -2.00 |      | 9  | 13 |    |  | CC  | 1.467399 |             |             |             |                      |
|      | 2.00  |      | 11 | 12 |    |  | CC  | 1.411714 |             |             |             |                      |
|      | -1.00 |      | 13 | 14 |    |  | CC  | 1.421718 |             |             |             |                      |

|      |       |      |    |    |    |    |      |          |             |             |            |                 |
|------|-------|------|----|----|----|----|------|----------|-------------|-------------|------------|-----------------|
|      | 2.00  |      | 16 | 2  |    |    | OC   | 1.355710 |             |             |            |                 |
| s 33 | 1.00  | STRE | 3  | 4  |    |    | CC   | 1.399714 | f1042<br>45 | f1383<br>11 |            | $\nu_{12}$ (CC) |
|      | 1.00  |      | 5  | 6  |    |    | CC   | 1.394906 |             |             |            |                 |
|      | 1.00  |      | 6  | 7  |    |    | CC   | 1.401921 |             |             |            |                 |
|      | 1.00  |      | 7  | 8  |    |    | CC   | 1.393725 |             |             |            |                 |
|      | -1.00 |      | 9  | 13 |    |    | CC   | 1.467399 |             |             |            |                 |
|      | 1.00  |      | 16 | 2  |    |    | OC   | 1.355710 |             |             |            |                 |
| s 34 | 1.00  | TORS | 23 | 5  | 11 | 10 | HCCC | 0.00     | f1029<br>87 |             |            | $\tau_1$ (CH_   |
|      | 1.00  |      | 24 | 6  | 7  | 25 | HCCH | 0.00     |             |             |            |                 |
| s 35 | 1.00  | STRE | 4  | 14 |    |    | CC   | 1.394778 | f1026<br>53 | f1202<br>14 |            | $\nu_{13}$ (CC) |
|      | -1.00 |      | 5  | 6  |    |    | CC   | 1.394906 |             |             |            |                 |
|      | -1.00 |      | 5  | 11 |    |    | CC   | 1.401102 |             |             |            |                 |
|      | -1.00 |      | 6  | 7  |    |    | CC   | 1.401921 |             |             |            |                 |
|      | -1.00 |      | 7  | 8  |    |    | CC   | 1.393725 |             |             |            |                 |
|      | -1.00 |      | 8  | 12 |    |    | CC   | 1.403283 |             |             |            |                 |
|      | 1.00  |      | 10 | 14 |    |    | CC   | 1.483912 |             |             |            |                 |
|      | -1.00 |      | 11 | 12 |    |    | CC   | 1.411714 |             |             |            |                 |
|      | -1.00 |      | 15 | 1  |    |    | OC   | 1.348683 |             |             |            |                 |
| s 36 | -1.00 | TORS | 21 | 3  | 4  | 22 | HCCH | 0.00     | f1001<br>86 |             |            | $\tau_2$ (CH)   |
|      | 1.00  |      | 23 | 5  | 6  | 24 | HCCH | 0.00     |             |             |            |                 |
|      | 1.00  |      | 25 | 7  | 6  | 5  | HCCC | -180.00  |             |             |            |                 |
|      | 1.00  |      | 26 | 8  | 12 | 9  | HCCC | 0.00     |             |             |            |                 |
|      | 1.00  |      | 26 | 8  | 12 | 11 | HCCC | -180.00  |             |             |            |                 |
| s 37 | 1.00  | TORS | 21 | 3  | 4  | 22 | HCCH | 0.00     | f997<br>87  |             |            | $\tau_3$ (CH_   |
|      | -1.00 |      | 22 | 4  | 3  | 2  | HCCC | -180.00  |             |             |            |                 |
|      | -1.00 |      | 22 | 4  | 14 | 10 | HCCC | 0.00     |             |             |            |                 |
| s 38 | 1.00  | TORS | 23 | 5  | 11 | 10 | HCCC | 0.00     | f935<br>69  | f886<br>12  |            | $\tau_4$ (CH_   |
|      | 1.00  |      | 24 | 6  | 5  | 11 | HCCC | -180.00  |             |             |            |                 |
|      | 1.00  |      | 25 | 7  | 8  | 12 | HCCC | -180.00  |             |             |            |                 |
|      | 1.00  |      | 26 | 8  | 12 | 9  | HCCC | 0.00     |             |             |            |                 |
| s 39 | 1.00  | BEND | 3  | 4  | 14 |    | CCC  | 120.79   | f897<br>63  |             |            | $\beta_2$ (CCC  |
|      | -1.00 |      | 4  | 14 | 13 |    | CCC  | 119.63   |             |             |            |                 |
|      | 1.00  |      | 5  | 6  | 7  |    | CCC  | 120.23   |             |             |            |                 |
|      | -1.00 |      | 5  | 11 | 10 |    | CCC  | 119.14   |             |             |            |                 |
|      | 1.00  |      | 11 | 10 | 14 |    | CCC  | 117.48   |             |             |            |                 |
|      | 1.00  |      | 11 | 10 | 18 |    | CCO  | 120.65   |             |             |            |                 |
| s 40 | 1.00  | OUT  | 17 | 12 | 13 | 9  | OCCC | 0.00     | f886<br>36  | f935<br>18  | f868<br>16 | $\tau$ (C=O3    |
| s 41 | -1.00 | TORS | 19 | 15 | 1  | 2  | HOCC | -180.00  | f879<br>64  |             |            | $\tau_5$ (CH_   |
|      | -1.00 |      | 19 | 15 | 1  | 13 | HOCC | 0.00     |             |             |            | H)              |
|      | 1.00  |      | 21 | 3  | 2  | 16 | HCCO | 0.00     |             |             |            |                 |
|      | 1.00  |      | 22 | 4  | 3  | 2  | HCCC | -180.00  |             |             |            |                 |
| s 42 | 1.00  | TORS | 19 | 15 | 1  | 2  | HOCC | -180.00  | f868<br>56  | f886<br>25  |            | $\tau$ (O1-H    |
| s 43 | 1.00  | STRE | 1  | 2  |    |    | CC   | 1.414741 | f841<br>59  |             |            | $\nu_{14}$ (CC) |

|      |       |      |    |    |    |    |      |          |            |            |            |                 |
|------|-------|------|----|----|----|----|------|----------|------------|------------|------------|-----------------|
|      | 1.00  |      | 1  | 13 |    |    | CC   | 1.406723 |            |            |            |                 |
|      | 1.00  |      | 2  | 3  |    |    | CC   | 1.392095 |            |            |            |                 |
|      | 1.00  |      | 3  | 4  |    |    | CC   | 1.399714 |            |            |            |                 |
|      | -1.00 |      | 7  | 8  |    |    | CC   | 1.393725 |            |            |            |                 |
|      | -1.00 |      | 8  | 12 |    |    | CC   | 1.403283 |            |            |            |                 |
|      | -1.00 |      | 9  | 12 |    |    | CC   | 1.483478 |            |            |            |                 |
|      | -1.00 |      | 11 | 12 |    |    | CC   | 1.411714 |            |            |            |                 |
|      | 1.00  |      | 15 | 1  |    |    | OC   | 1.348683 |            |            |            |                 |
|      | 1.00  |      | 16 | 2  |    |    | OC   | 1.355710 |            |            |            |                 |
| s 44 | -1.00 | OUT  | 17 | 12 | 13 | 9  | OCCC | 0.00     | f816<br>36 | f741<br>30 | f879<br>11 | $\tau$ (C=O3)   |
|      | 1.00  |      | 18 | 11 | 14 | 10 | OCCC | 0.00     |            |            |            |                 |
| s 45 | 1.00  | OUT  | 9  | 8  | 11 | 12 | CCCC | 0.00     | f807<br>75 |            |            | $\tau_1$ (CCC)  |
|      | 1.00  | TORS | 1  | 2  | 3  | 4  | CCCC | 0.00     |            |            |            |                 |
|      | 1.00  |      | 2  | 3  | 4  | 14 | CCCC | 0.00     |            |            |            |                 |
|      | 1.00  |      | 5  | 6  | 7  | 8  | CCCC | 0.00     |            |            |            |                 |
|      | 1.00  |      | 6  | 7  | 8  | 12 | CCCC | 0.00     |            |            |            |                 |
|      | 1.00  |      | 7  | 6  | 5  | 11 | CCCC | 0.00     |            |            |            |                 |
|      | -1.00 | OUT  | 15 | 2  | 13 | 1  | OCCC | 0.00     |            |            |            |                 |
|      | -1.00 |      | 16 | 1  | 3  | 2  | OCCC | 0.00     |            |            |            |                 |
| s 46 | -1.00 | BEND | 2  | 3  | 4  |    | CCC  | 120.21   | f757<br>68 |            |            | $\beta_3$ (CCC) |
|      | 1.00  |      | 6  | 7  | 8  |    | CCC  | 120.04   |            |            |            |                 |
|      | -1.00 |      | 11 | 10 | 14 |    | CCC  | 117.48   |            |            |            |                 |
|      | 1.00  |      | 11 | 10 | 18 |    | CCO  | 120.65   |            |            |            |                 |
|      | 1.00  |      | 12 | 9  | 13 |    | CCC  | 118.42   |            |            |            |                 |
|      | -1.00 |      | 12 | 9  | 17 |    | CCO  | 120.74   |            |            |            |                 |
| s 47 | 1.00  | TORS | 23 | 5  | 11 | 12 | HCCC | -180.00  | f741<br>57 | f816<br>34 |            | $\tau_6$ (CH_)  |
|      | 1.00  |      | 24 | 6  | 5  | 11 | HCCC | -180.00  |            |            |            |                 |
|      | 1.00  |      | 25 | 7  | 6  | 5  | HCCC | -180.00  |            |            |            |                 |
|      | 1.00  |      | 26 | 8  | 7  | 6  | HCCC | -180.00  |            |            |            |                 |
| s 48 | 1.00  | TORS | 6  | 7  | 8  | 12 | CCCC | 0.00     | f713<br>79 |            |            | $\tau_2$ (CCC)  |
|      | 1.00  |      | 7  | 6  | 5  | 11 | CCCC | 0.00     |            |            |            |                 |
|      | 1.00  | OUT  | 15 | 2  | 13 | 1  | OCCC | 0.00     |            |            |            |                 |
|      | 1.00  |      | 16 | 1  | 3  | 2  | OCCC | 0.00     |            |            |            |                 |
|      | 1.00  |      | 17 | 12 | 13 | 9  | OCCC | 0.00     |            |            |            |                 |
| s 49 | -1.00 | BEND | 3  | 4  | 14 |    | CCC  | 120.79   | f694<br>79 |            |            | $\beta_4$ (CCC) |
|      | 1.00  |      | 4  | 14 | 10 |    | CCC  | 119.83   |            |            |            |                 |
|      | -1.00 |      | 5  | 6  | 7  |    | CCC  | 120.23   |            |            |            |                 |
|      | 1.00  |      | 13 | 9  | 17 |    | CCO  | 120.84   |            |            |            |                 |
|      | -1.00 |      | 14 | 10 | 18 |    | CCO  | 121.88   |            |            |            |                 |
| s 50 | 1.00  | BEND | 5  | 6  | 7  |    | CCC  | 120.23   | f668<br>71 |            |            | $\beta_5$ (CCC) |
|      | 1.00  |      | 6  | 7  | 8  |    | CCC  | 120.04   |            |            |            |                 |
| s 51 | -1.00 | BEND | 2  | 1  | 13 |    | CCC  | 120.13   | f620<br>61 |            |            | $\beta_6$ (CCC) |
|      | 1.00  |      | 3  | 2  | 16 |    | CCO  | 120.46   |            |            |            |                 |
|      | -1.00 |      | 3  | 4  | 14 |    | CCC  | 120.79   |            |            |            |                 |
|      | -1.00 |      | 9  | 12 | 11 |    | CCC  | 120.52   |            |            |            |                 |
|      | -1.00 |      | 9  | 13 | 14 |    | CCC  | 121.64   |            |            |            |                 |

|      |       |      |    |    |    |    |      |          |            |             |  |                                    |
|------|-------|------|----|----|----|----|------|----------|------------|-------------|--|------------------------------------|
| s 52 | 1.00  | TORS | 3  | 4  | 14 | 13 | CCCC | 0.00     | f605<br>83 |             |  | $\tau_3$ (CCC                      |
|      | -1.00 |      | 5  | 6  | 7  | 8  | CCCC | 0.00     |            |             |  |                                    |
|      | -1.00 |      | 6  | 5  | 11 | 10 | CCCC | -180.00  |            |             |  |                                    |
|      | 1.00  |      | 14 | 13 | 1  | 15 | CCCO | -180.00  |            |             |  |                                    |
|      | -1.00 |      | 14 | 13 | 9  | 17 | CCCO | -180.00  |            |             |  |                                    |
|      | -1.00 | OUT  | 16 | 1  | 3  | 2  | OCCC | 0.00     |            |             |  |                                    |
| s 53 | 1.00  | BEND | 2  | 1  | 13 |    | CCC  | 120.13   | f577<br>56 |             |  | $\beta_7$ (CCC                     |
|      | 1.00  |      | 2  | 3  | 4  |    | CCC  | 120.21   |            |             |  |                                    |
|      | 1.00  |      | 3  | 4  | 14 |    | CCC  | 120.79   |            |             |  |                                    |
|      | -1.00 |      | 6  | 5  | 11 |    | CCC  | 120.25   |            |             |  |                                    |
|      | 1.00  |      | 8  | 12 | 11 |    | CCC  | 119.98   |            |             |  |                                    |
|      | -1.00 |      | 9  | 12 | 11 |    | CCC  | 120.52   |            |             |  |                                    |
|      | 1.00  |      | 11 | 10 | 18 |    | CCO  | 120.65   |            |             |  |                                    |
|      | 1.00  |      | 12 | 9  | 13 |    | CCC  | 118.42   |            |             |  |                                    |
| s 54 | -1.00 | TORS | 1  | 2  | 3  | 4  | CCCC | 0.00     | f532<br>51 | f522<br>29  |  | $\tau_4$ (CCC                      |
|      | 1.00  |      | 2  | 3  | 4  | 14 | CCCC | 0.00     |            |             |  |                                    |
|      | -1.00 |      | 5  | 6  | 7  | 8  | CCCC | 0.00     |            |             |  |                                    |
|      | -1.00 |      | 9  | 13 | 1  | 15 | CCCO | 0.00     |            |             |  |                                    |
|      | -1.00 |      | 13 | 1  | 2  | 16 | CCCO | -180.00  |            |             |  |                                    |
| s 55 | 1.00  | TORS | 20 | 16 | 2  | 1  | HOCC | 0.00     | f522<br>59 | f532<br>36  |  | $\tau$ (O2-H                       |
| s 56 | 1.00  | BEND | 3  | 2  | 16 |    | CCO  | 120.46   | f484<br>63 |             |  | $\beta_1$ (CCO                     |
|      | 1.00  |      | 5  | 11 | 12 |    | CCC  | 119.45   |            |             |  |                                    |
|      | 1.00  |      | 11 | 10 | 14 |    | CCC  | 117.48   |            |             |  |                                    |
|      | -1.00 |      | 13 | 1  | 15 |    | CCO  | 123.53   |            |             |  |                                    |
| s 57 | -1.00 | STRE | 1  | 4  |    |    | CC   | 2.801175 | f472<br>68 |             |  | $\nu$ (quin                        |
|      | -1.00 |      | 5  | 8  |    |    | CC   | 2.801882 |            |             |  |                                    |
|      | 4.00  |      | 9  | 10 |    |    | CC   | 2.945785 |            |             |  |                                    |
| s 58 | 1.00  | TORS | 5  | 6  | 7  | 8  | CCCC | 0.00     | f470<br>80 |             |  | $\tau_5$ (CCC                      |
|      | 1.00  |      | 5  | 11 | 12 | 8  | CCCC | 0.00     |            |             |  |                                    |
|      | -1.00 |      | 6  | 7  | 8  | 12 | CCCC | 0.00     |            |             |  |                                    |
|      | 1.00  |      | 11 | 12 | 9  | 17 | CCCO | -180.00  |            |             |  |                                    |
|      | 1.00  |      | 12 | 11 | 10 | 18 | CCCO | -180.00  |            |             |  |                                    |
|      | -1.00 |      | 13 | 1  | 2  | 16 | CCCO | -180.00  |            |             |  |                                    |
| s 59 | -1.00 | TORS | 6  | 7  | 8  | 12 | CCCC | 0.00     | f437<br>83 |             |  | $\tau_6$ (CCC                      |
|      | 1.00  |      | 7  | 6  | 5  | 11 | CCCC | 0.00     |            |             |  |                                    |
| s 60 | 1.00  | BEND | 1  | 13 | 9  |    | CCC  | 118.99   | f425<br>62 | f1383<br>10 |  | $\beta_8$ (CCC<br>O1H...<br>breaki |
|      | 1.00  |      | 2  | 1  | 13 |    | CCC  | 120.13   |            |             |  |                                    |
|      | -1.00 |      | 8  | 12 | 9  |    | CCC  | 119.50   |            |             |  |                                    |
|      | 1.00  |      | 8  | 12 | 11 |    | CCC  | 119.98   |            |             |  |                                    |
|      | -1.00 |      | 11 | 10 | 18 |    | CCO  | 120.65   |            |             |  |                                    |
|      | -2.00 |      | 12 | 9  | 17 |    | CCO  | 120.74   |            |             |  |                                    |
|      | 2.00  |      | 13 | 9  | 17 |    | CCO  | 120.84   |            |             |  |                                    |
| s 61 | -1.00 | BEND | 2  | 1  | 15 |    | CCO  | 116.35   | f389<br>60 |             |  | $\beta_9$ (CCC                     |

|      |       |      |    |    |    |    |      |          |            |  |  |                   |
|------|-------|------|----|----|----|----|------|----------|------------|--|--|-------------------|
|      | -2.00 |      | 4  | 14 | 13 |    | CCC  | 119.63   |            |  |  |                   |
|      | 2.00  |      | 5  | 11 | 12 |    | CCC  | 119.45   |            |  |  |                   |
|      | -2.00 |      | 8  | 12 | 9  |    | CCC  | 119.50   |            |  |  |                   |
|      | -2.00 |      | 8  | 12 | 11 |    | CCC  | 119.98   |            |  |  |                   |
|      | 3.00  |      | 10 | 14 | 13 |    | CCC  | 120.55   |            |  |  |                   |
|      | -2.00 |      | 12 | 9  | 13 |    | CCC  | 118.42   |            |  |  |                   |
|      | 3.00  |      | 13 | 1  | 15 |    | CCO  | 123.53   |            |  |  |                   |
|      | 3.00  |      | 14 | 10 | 18 |    | CCO  | 121.88   |            |  |  |                   |
| s 62 | 1.00  | BEND | 1  | 2  | 16 |    | CCO  | 119.67   | f346<br>81 |  |  | $\beta_2$ (CCO    |
|      | 1.00  |      | 2  | 1  | 15 |    | CCO  | 116.35   |            |  |  |                   |
|      | 1.00  |      | 14 | 10 | 18 |    | CCO  | 121.88   |            |  |  |                   |
| s 63 | 1.00  | OUT  | 10 | 4  | 13 | 14 | CCCC | 0.00     | f342<br>91 |  |  | $\tau_7$ (CCC     |
|      | 2.00  | TORS | 1  | 2  | 3  | 4  | CCCC | 0.00     |            |  |  |                   |
|      | -2.00 |      | 2  | 3  | 4  | 14 | CCCC | 0.00     |            |  |  |                   |
|      | 4.00  |      | 4  | 3  | 2  | 16 | CCCC | -180.00  |            |  |  |                   |
|      | -1.00 |      | 5  | 11 | 10 | 18 | CCCC | 0.00     |            |  |  |                   |
|      | -2.00 |      | 9  | 13 | 1  | 15 | CCCC | 0.00     |            |  |  |                   |
|      | 1.00  |      | 12 | 9  | 13 | 14 | CCCC | 0.00     |            |  |  |                   |
|      | -1.00 |      | 12 | 11 | 10 | 18 | CCCC | -180.00  |            |  |  |                   |
|      | -3.00 |      | 14 | 13 | 1  | 15 | CCCC | -180.00  |            |  |  |                   |
|      | -2.00 | OUT  | 16 | 1  | 3  | 2  | OCCC | 0.00     |            |  |  |                   |
| s 64 | 1.00  | STRE | 2  | 13 |    |    | CC   | 2.445020 | f328<br>79 |  |  | $\nu$ (acco       |
|      | 1.00  |      | 3  | 14 |    |    | CC   | 2.429681 |            |  |  |                   |
|      | 1.00  |      | 6  | 11 |    |    | CC   | 2.424505 |            |  |  |                   |
|      | 1.00  |      | 7  | 12 |    |    | CC   | 2.422830 |            |  |  |                   |
|      | 2.00  |      | 11 | 14 |    |    | CC   | 2.549280 |            |  |  |                   |
|      | 2.00  |      | 12 | 13 |    |    | CC   | 2.534937 |            |  |  |                   |
| s 65 | 3.00  | BEND | 1  | 2  | 16 |    | CCO  | 119.67   | f286<br>81 |  |  | $\beta_{10}$ (CCO |
|      | -1.00 |      | 2  | 1  | 13 |    | CCC  | 120.13   |            |  |  |                   |
|      | -1.00 |      | 4  | 14 | 10 |    | CCC  | 119.83   |            |  |  |                   |
|      | 3.00  |      | 5  | 11 | 10 |    | CCC  | 119.14   |            |  |  |                   |
|      | -2.00 |      | 8  | 12 | 9  |    | CCC  | 119.50   |            |  |  |                   |
|      | -2.00 |      | 9  | 13 | 14 |    | CCC  | 121.64   |            |  |  |                   |
|      | 1.00  |      | 11 | 10 | 18 |    | CCO  | 120.65   |            |  |  |                   |
|      | -1.00 |      | 12 | 9  | 17 |    | CCO  | 120.74   |            |  |  |                   |
| s 66 | -1.00 | TORS | 1  | 2  | 3  | 4  | CCCC | 0.00     | f271<br>88 |  |  | $\tau_8$ (CCC     |
|      | -4.00 |      | 4  | 14 | 13 | 9  | CCCC | -180.00  |            |  |  |                   |
|      | -2.00 |      | 6  | 5  | 11 | 10 | CCCC | -180.00  |            |  |  |                   |
|      | 2.00  |      | 7  | 8  | 12 | 9  | CCCC | -180.00  |            |  |  |                   |
|      | -2.00 |      | 14 | 13 | 1  | 15 | CCCC | -180.00  |            |  |  |                   |
| s 67 | -1.00 | BEND | 1  | 13 | 9  |    | CCC  | 118.99   | f196<br>74 |  |  | $\beta_{11}$ (CCO |
|      | -1.00 |      | 8  | 12 | 9  |    | CCC  | 119.50   |            |  |  |                   |
|      | 1.00  |      | 12 | 9  | 13 |    | CCC  | 118.42   |            |  |  |                   |
| s 68 | 1.00  | TORS | 6  | 5  | 11 | 10 | CCCC | -180.00  | f188<br>83 |  |  | $\tau_9$ (CCC     |
|      | -1.00 |      | 7  | 8  | 12 | 9  | CCCC | -180.00  |            |  |  |                   |
|      | -1.00 |      | 11 | 12 | 9  | 17 | CCCC | -180.00  |            |  |  |                   |
|      | 1.00  |      | 12 | 11 | 10 | 18 | CCCC | -180.00  |            |  |  |                   |

|      |       |      |    |    |    |    |      |         |            |  |  |                                                  |
|------|-------|------|----|----|----|----|------|---------|------------|--|--|--------------------------------------------------|
| s 69 | 1.00  | TORS | 1  | 13 | 9  | 17 | CCCO | 0.00    | f147<br>87 |  |  | $\tau_{10}$ (CC                                  |
|      | 1.00  |      | 2  | 1  | 13 | 9  | CCCC | -180.00 |            |  |  |                                                  |
|      | 1.00  |      | 5  | 11 | 12 | 8  | CCCC | 0.00    |            |  |  |                                                  |
|      | 1.00  |      | 9  | 13 | 1  | 15 | CCCO | 0.00    |            |  |  |                                                  |
|      | -1.00 |      | 11 | 12 | 9  | 13 | CCCC | 0.00    |            |  |  |                                                  |
|      | -1.00 |      | 13 | 1  | 2  | 16 | CCCO | -180.00 |            |  |  |                                                  |
| s 70 | 1.00  | TORS | 3  | 2  | 1  | 13 | CCCC | 0.00    | f125<br>82 |  |  | $\tau_{11}$ (CC<br>( <sup>f</sup> ( <sup>g</sup> |
|      | 1.00  |      | 3  | 4  | 14 | 10 | CCCC | -180.00 |            |  |  |                                                  |
|      | 1.00  |      | 5  | 11 | 12 | 8  | CCCC | 0.00    |            |  |  |                                                  |
|      | -1.00 |      | 6  | 5  | 11 | 10 | CCCC | -180.00 |            |  |  |                                                  |
|      | -1.00 |      | 7  | 6  | 5  | 11 | CCCC | 0.00    |            |  |  |                                                  |
|      | -1.00 |      | 12 | 11 | 10 | 18 | CCCO | -180.00 |            |  |  |                                                  |
|      | 1.00  |      | 13 | 1  | 2  | 16 | CCCO | -180.00 |            |  |  |                                                  |
| s 71 | 1.00  | TORS | 1  | 2  | 3  | 4  | CCCC | 0.00    | f95<br>86  |  |  | $\tau_{12}$ (CC                                  |
|      | 1.00  |      | 1  | 13 | 14 | 10 | CCCC | -180.00 |            |  |  |                                                  |
|      | -1.00 |      | 2  | 1  | 13 | 9  | CCCC | -180.00 |            |  |  |                                                  |
|      | -1.00 |      | 3  | 4  | 14 | 10 | CCCC | -180.00 |            |  |  |                                                  |
|      | -1.00 |      | 9  | 13 | 1  | 15 | CCCO | 0.00    |            |  |  |                                                  |
|      | -1.00 |      | 11 | 12 | 9  | 13 | CCCC | 0.00    |            |  |  |                                                  |
| s 72 | 1.00  | TORS | 1  | 13 | 9  | 12 | CCCC | -180.00 | f49<br>90  |  |  | $\tau$ (Butt                                     |
|      | -1.00 |      | 2  | 1  | 13 | 9  | CCCC | -180.00 |            |  |  |                                                  |
|      | 1.00  |      | 5  | 11 | 10 | 14 | CCCC | -180.00 |            |  |  |                                                  |
|      | -1.00 |      | 8  | 12 | 9  | 17 | CCCO | 0.00    |            |  |  |                                                  |
|      | 1.00  |      | 12 | 9  | 13 | 14 | CCCC | 0.00    |            |  |  |                                                  |
